# Supplementary material for: The first metazoa living in permanently anoxic conditions
Source: Springer Nature journal article supplement (doi:10.1186/1741-7007-8-30), 2010-04-06

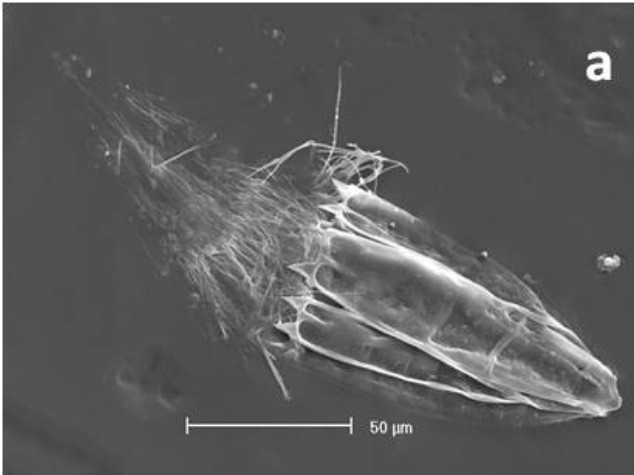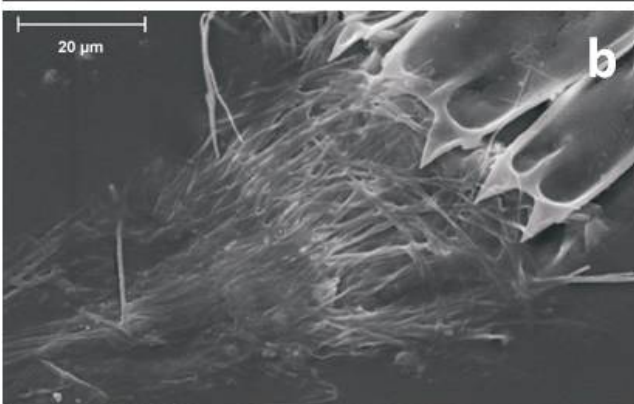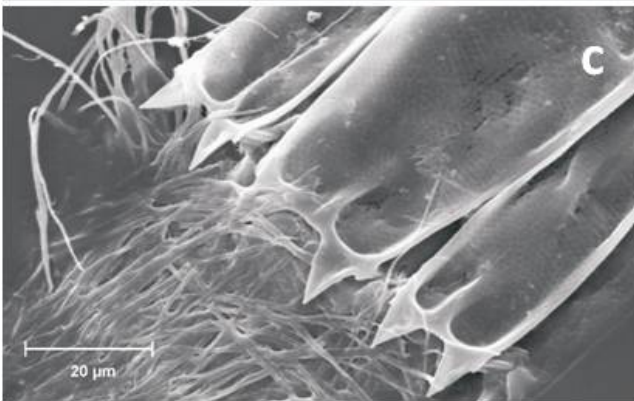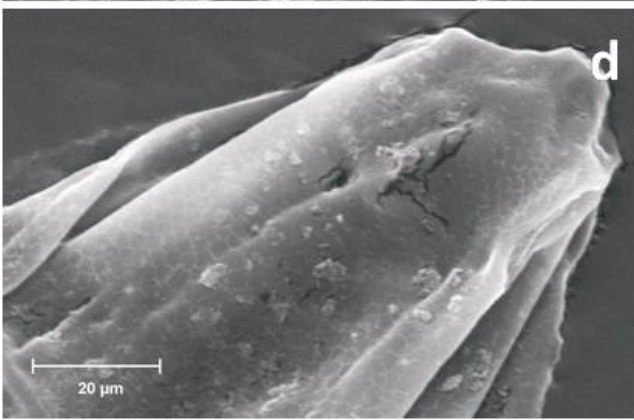

Supplement: 12915_2010_326_MOESM8_ESM.pdf [file 12915_2010_326_MOESM8_ESM.pdf]
