# Supplementary material for: The first metazoa living in permanently anoxic conditions
Source: Springer Nature journal article supplement (doi:10.1186/1741-7007-8-30), 2010-04-06

**a**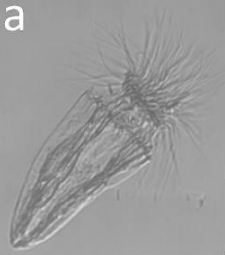

section 1

section 5

section 9

section 16

section 21

Merged 21  
sections

section 12

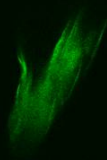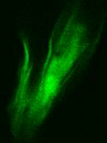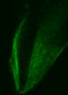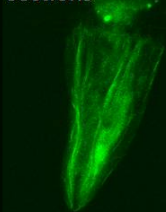**b**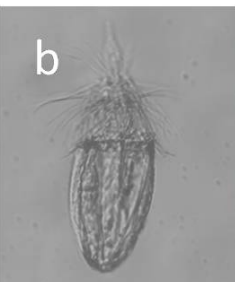

section 1

section 5

section 9

section 12

section 16

section 21

Merged 21  
sections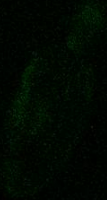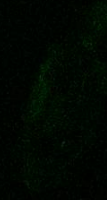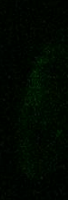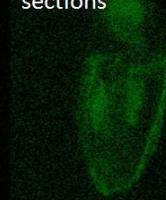

Supplement: 12915_2010_326_MOESM9_ESM.pdf [file 12915_2010_326_MOESM9_ESM.pdf]
