# Supplementary material for: The first metazoa living in permanently anoxic conditions
Source: Springer Nature journal article supplement (doi:10.1186/1741-7007-8-30), 2010-04-06

**Additional File 6: Fourier-transformed infra-red spectroscopy of loriferans from the L'Atalante basin and the NE Atlantic Ocean.** Comparison of: (a) Fourier-transformed infra-red spectra of loriferans collected from the L'Atalante basin (blue line) and from the oxygenated sediments of the NE Atlantic Ocean (red line); (b) spectra of chitosan (black line) and the lorica of the loriferans collected in the L'Atalante basin (blue line); (c) spectra of chitin (green line) and the lorica of the loriferans collected from the oxygenated sediments of the NE Atlantic Ocean (red line).

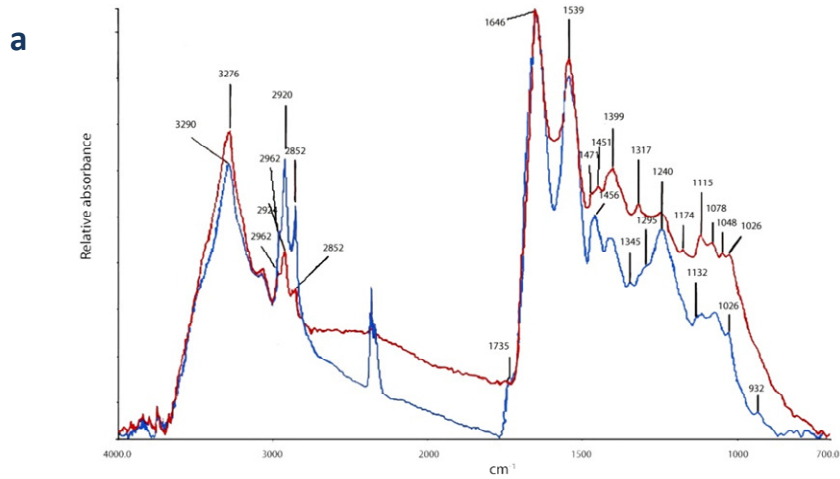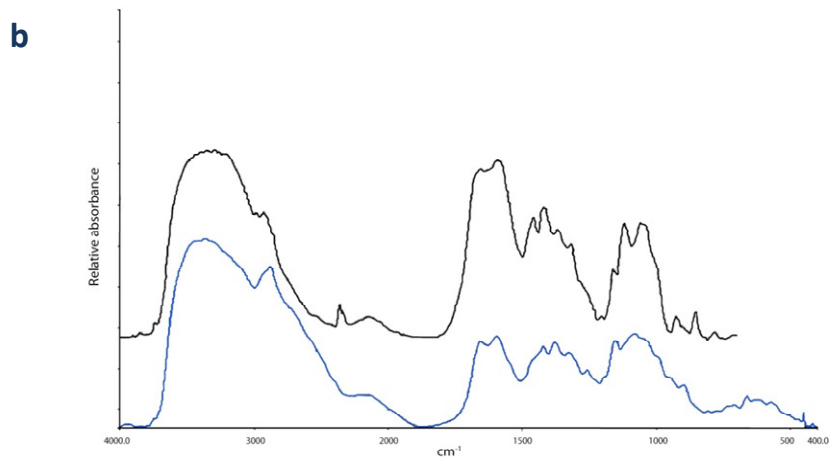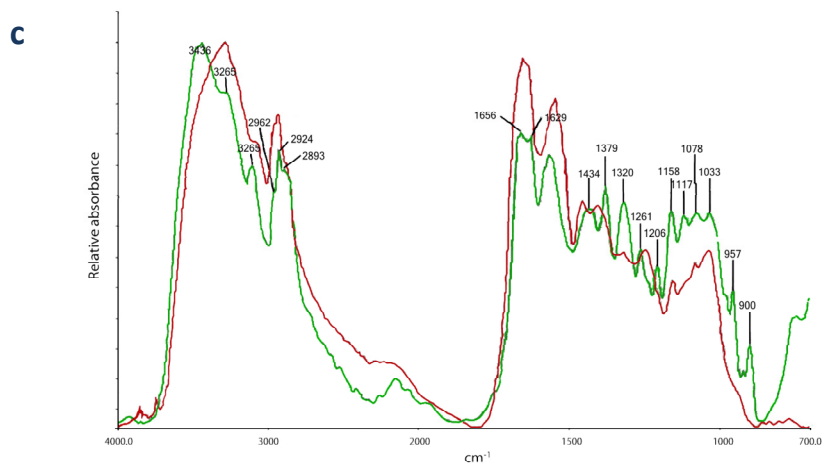

Supplement: Additional file 6 [file 1741-7007-8-30-s6.pdf]
